# Supplementary material
Source: MDPI journal article supplement (https://www.mdpi.com/2673-4184/2/4/33)
Supplement: s1 [file s1]

## Search Terms

(very-late-onset-schizophrenia) OR (very late onset psychosis) OR (late life psychosis) OR (late life schizophrenia) OR (late life paraphrenia) OR (late life psychotic disorder) OR (Parkinson's disease) OR (dementia) OR (Alzheimer's disease) OR (geriatric onset depression) OR (geriatric onset depression psychosis) OR (positive symptoms)

AND

(sex) OR (gender) OR (female) OR (woman) OR (woman) OR (estrogen) OR (estradiol) OR (progesterone) OR (\*menopause) OR (estrogen withdrawal) OR (circulating estrogen)

AND

(neuroinflammation) OR (neuroinflammatory) OR (neuroinfl\*) OR (microglia\*) OR (dopamin\*) OR (neurodegeneration) OR (neurodevelopmental) OR (neuroprotect\*)

AND

(psychosocial) OR (psychosocial risk factors) OR (aging) OR (stress) OR (cogniti\*)
